# Supplementary material
Source: Springer Nature journal article supplement (https://www.springermedizin.de/resource/supplementary/12865_2009_285_MOESM8_ESM.pdf/9427688)

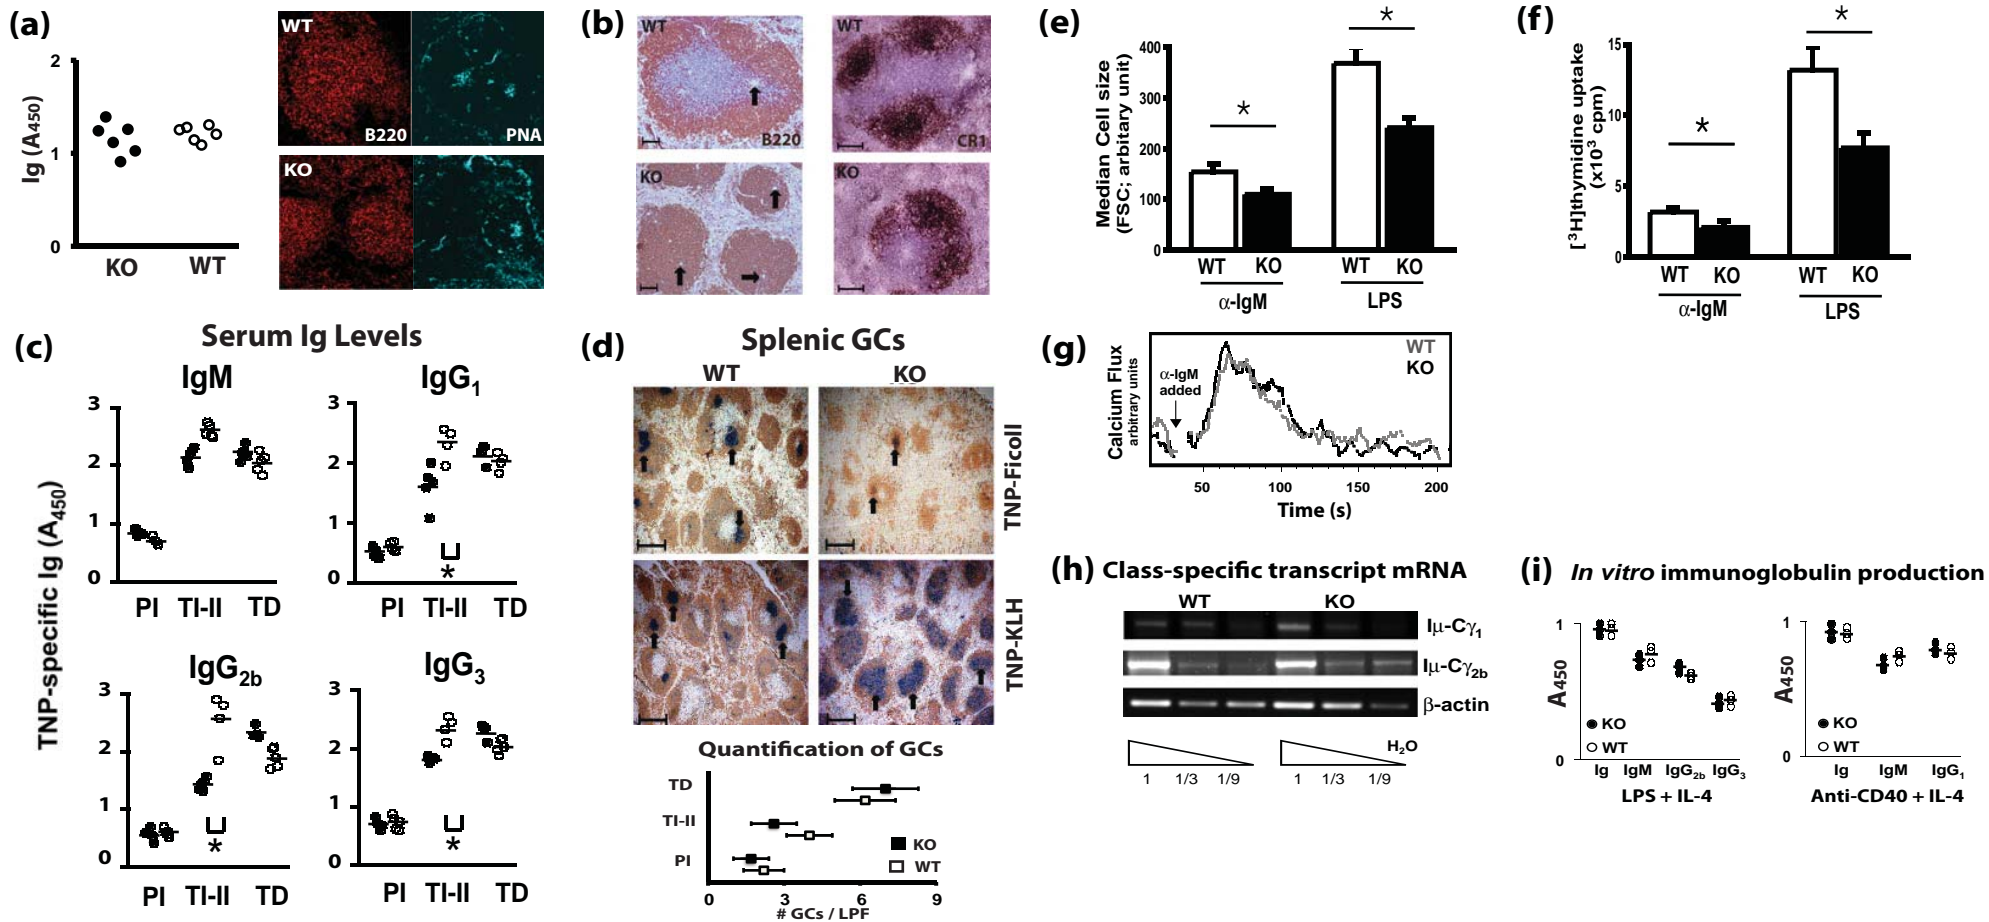

Supplement: MOESM8 [file 9427688]
